# Supplementary material for: DunedinPACE, a DNA methylation biomarker of the pace of aging
Source: eLife journal article supplement (doi:10.7554/elife.73420), 2022-01-14

Effect-size - Pearson  $r$

Phenotypic Age Advancement

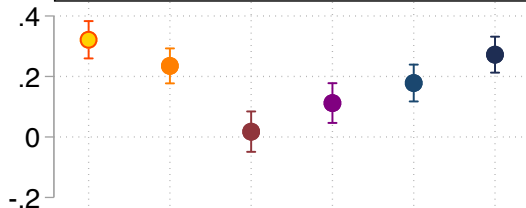

KDM BA Advancement

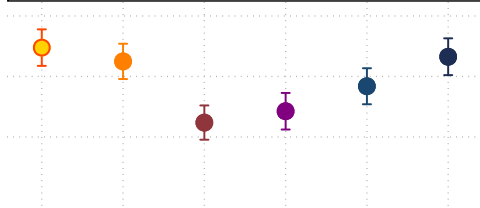

Homeostatic Dysregulation

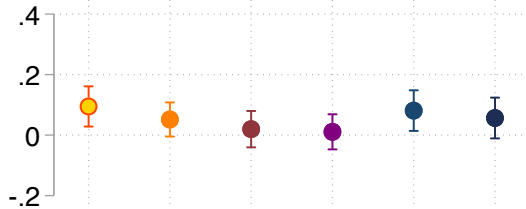

Self-rated Health

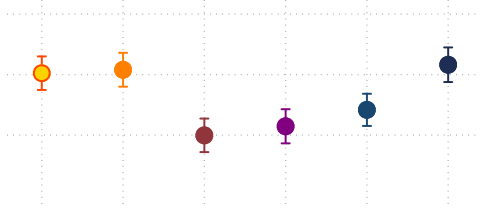

Supplement: supp [file elife_poa_e73420_Figure_3_figure_supplement_1.pdf › elife_poa_e73420_Figure_3_figure_supplement_1.pdf]
