# Supplementary material for: DunedinPACE, a DNA methylation biomarker of the pace of aging
Source: eLife. 2022 Jan 14;11:e73420. doi: 10.7554/eLife.73420 (PMC8853656; doi:10.7554/eLife.73420)
Supplement: Supplementary file 2. — Effect-sizes are reported for a one standard deviation increment of DunedinPACE. Outcome variables in Dunedin Study, Understanding Society Study, and E-Risk Study (Panels A, B, C, and E) were z-transformed for analysis; effect-sizes are interpretable as Pearson r or Cohen’s d. For Normative Aging Study and Framingham Analysis (Panel C), effect-sizes for time-to event outcomes are reported as hazard ratios (HR), effect-sizes for prevalent chronic disease are reported as Risk Ratios (RR), and effect-sizes for incident disability are reported as incidence rate ratios (IRR). (A) Effect-sizes for associations of DunedinPACE, DunedinPoAm, and DNA methylation clocks with functional assessments at age 45 in the Dunedin Study. Effect-sizes are standardized coefficients from linear regressions of the outcomes on the aging measures. The models adjusted for cell counts (middle column of results) were adjusted for cell counts measured from complete blood count data (white blood cell count and percentages of lymphocytes, monocytes, neutrophils, eosinophils, and basophils). The models adjusted for smoking (left-most column of results) included a covariate for number of pack-years smoked. (B) Effect-sizes for associations of DunedinPACE, DunedinPoAm, and DNA methylation clocks with functional decline in the Dunedin Study. Decline was measured as change between the age-38 and age-45 assessments for all measures except cognition, for which change was computed over the interval beginning with an adolescent baseline test at age 13 and ending with the most recent cognitive assessment at age 45. Effect-sizes are coefficients from linear regressions of change scores on aging measures for all outcomes except incident fair/poor health, for which effect-sizes are risk ratios (RR) estimated from Poisson regression of incidence on the aging measures. Change scores were computed by standardizing baseline and follow-up measurements using the mean and standard deviation (SD) of the baseline asses [file elife-73420-supp2.xlsx]

## Sheet: Panel A
	Model Adjusted for Sex				Model Adjusted for Sex and Cell Counts				Model Adjusted for Sex and Smoking
DunedinPACE	b	95% CI	p-value		b	95% CI	p-value		b	95% CI	p-value
Balance	-0.362386	[-0.42 , -0.30]	4.93589e-32		-0.321759	[-0.39 , -0.26]	1.09664e-21		-0.335907	[-0.40 , -0.27]	2.96226e-23
Gait Speed	-0.33904	[-0.40 , -0.27]	4.37052e-23		-0.320356	[-0.39 , -0.25]	6.09236e-19		-0.304639	[-0.38 , -0.23]	5.31892e-15
Steps in Place	-0.246677	[-0.32 , -0.18]	1.00006e-11		-0.227433	[-0.30 , -0.15]	4.6758e-09		-0.179852	[-0.26 , -0.10]	2.21518e-05
Chair Stands	-0.294254	[-0.36 , -0.23]	6.42999e-20		-0.287573	[-0.35 , -0.22]	2.13617e-16		-0.277503	[-0.35 , -0.21]	5.44376e-15
Grip Strength	-0.109747	[-0.18 , -0.04]	0.00177263		-0.116837	[-0.19 , -0.04]	0.00154002		-0.117164	[-0.20 , -0.04]	0.00350591
Motor Coordination	-0.220961	[-0.29 , -0.15]	1.59795e-09		-0.226987	[-0.30 , -0.15]	1.15672e-08		-0.191747	[-0.27 , -0.11]	3.51609e-06
Physical Limitations	0.231257	[0.16 , 0.30]	7.56129e-10		0.222223	[0.14 , 0.30]	3.18815e-08		0.201669	[0.12 , 0.29]	2.56285e-06
Perceptual Reasoning	-0.320361	[-0.38 , -0.26]	7.55518e-25		-0.304298	[-0.37 , -0.24]	2.51647e-20		-0.256953	[-0.32 , -0.19]	2.29762e-13
Working Memory	-0.26648	[-0.33 , -0.20]	1.71036e-16		-0.264519	[-0.33 , -0.20]	1.93453e-14		-0.231088	[-0.30 , -0.16]	2.4637e-10
Processing Speed	-0.23152	[-0.30 , -0.16]	1.84509e-10		-0.233786	[-0.31 , -0.16]	3.19911e-09		-0.175995	[-0.26 , -0.09]	2.25987e-05
Self-rated Health	-0.343856	[-0.41 , -0.28]	1.67543e-22		-0.307645	[-0.38 , -0.23]	4.4869e-16		-0.281946	[-0.35 , -0.21]	6.21662e-14
Facial Aging	0.377129	[0.31 , 0.44]	2.2255e-26		0.393087	[0.32 , 0.47]	6.94982e-23		0.279037	[0.21 , 0.35]	9.11671e-15
DunedinPoAm	b	95% CI	p-value		b	95% CI	p-value		b	95% CI	p-value
Balance	-0.279273	[-0.35 , -0.21]	1.01611e-15		-0.223013	[-0.30 , -0.15]	1.29206e-08		-0.242278	[-0.33 , -0.16]	1.74487e-08
Gait Speed	-0.268579	[-0.33 , -0.20]	2.86933e-15		-0.246292	[-0.32 , -0.17]	1.17995e-10		-0.22164	[-0.31 , -0.13]	6.4606e-07
Steps in Place	-0.226797	[-0.30 , -0.16]	3.99905e-10		-0.218587	[-0.30 , -0.14]	1.31606e-07		-0.138484	[-0.23 , -0.04]	0.00394917
Chair Stands	-0.196598	[-0.27 , -0.12]	1.60175e-07		-0.182385	[-0.26 , -0.10]	1.53429e-05		-0.157266	[-0.25 , -0.07]	0.000549181
Grip Strength	-0.0829907	[-0.15 , -0.01]	0.0232961		-0.0992075	[-0.18 , -0.02]	0.0115067		-0.097645	[-0.19 , 0.00]	0.0405944
Motor Coordination	-0.15488	[-0.22 , -0.09]	6.74128e-06		-0.16549	[-0.23 , -0.10]	1.89199e-06		-0.101123	[-0.18 , -0.02]	0.0177518
Physical Limitations	0.163835	[0.09 , 0.24]	2.17262e-05		0.143307	[0.05 , 0.23]	0.00165747		0.110701	[0.02 , 0.21]	0.0224569
Perceptual Reasoning	-0.306997	[-0.37 , -0.25]	5.88961e-22		-0.298851	[-0.37 , -0.23]	3.38355e-16		-0.236893	[-0.32 , -0.16]	5.36963e-09
Working Memory	-0.24093	[-0.31 , -0.18]	8.36758e-13		-0.246602	[-0.32 , -0.17]	1.19225e-10		-0.203086	[-0.29 , -0.12]	2.47149e-06
Processing Speed	-0.208676	[-0.28 , -0.14]	6.41323e-09		-0.219041	[-0.30 , -0.14]	6.02815e-08		-0.134085	[-0.23 , -0.04]	0.00439021
Self-rated Health	-0.258656	[-0.33 , -0.19]	4.71434e-13		-0.207055	[-0.29 , -0.13]	6.33445e-07		-0.156438	[-0.24 , -0.07]	0.000515286
Facial Aging	0.359001	[0.30 , 0.42]	1.55701e-26		0.398317	[0.32 , 0.47]	8.88661e-24		0.23559	[0.16 , 0.31]	4.58958e-09
Horvath Clock	b	95% CI	p-value		b	95% CI	p-value		b	95% CI	p-value
Balance	-0.0530273	[-0.12 , 0.02]	0.12997		-0.0295291	[-0.10 , 0.04]	0.4012		-0.0535421	[-0.12 , 0.01]	0.11685
Gait Speed	-0.0788464	[-0.14 , -0.01]	0.0194783		-0.0600702	[-0.13 , 0.01]	0.0808419		-0.0792662	[-0.14 , -0.02]	0.015681
Steps in Place	-0.0290868	[-0.09 , 0.03]	0.365015		-0.0169418	[-0.08 , 0.05]	0.597188		-0.0277502	[-0.09 , 0.03]	0.379176
Chair Stands	-0.0510237	[-0.12 , 0.02]	0.155657		-0.0432247	[-0.11 , 0.03]	0.227396		-0.0490135	[-0.12 , 0.02]	0.164893
Grip Strength	-0.0202777	[-0.09 , 0.05]	0.542699		-0.0133694	[-0.08 , 0.05]	0.684749		-0.0202091	[-0.09 , 0.05]	0.544175
Motor Coordination	0.0143054	[-0.06 , 0.09]	0.717975		0.022532	[-0.05 , 0.10]	0.563682		0.014333	[-0.06 , 0.09]	0.717344
Physical Limitations	-0.0378814	[-0.11 , 0.03]	0.276274		-0.0524301	[-0.12 , 0.02]	0.133529		-0.0391347	[-0.11 , 0.03]	0.251857
Perceptual Reasoning	-0.0608259	[-0.13 , 0.01]	0.083649		-0.044531	[-0.11 , 0.02]	0.202501		-0.0613459	[-0.13 , 0.00]	0.0691636
Working Memory	-0.0639406	[-0.14 , 0.01]	0.0841776		-0.0517712	[-0.12 , 0.02]	0.160678		-0.0652304	[-0.14 , 0.01]	0.0705614
Processing Speed	-0.0843692	[-0.16 , -0.01]	0.0243542		-0.0794507	[-0.15 , -0.01]	0.0329531		-0.0850753	[-0.16 , -0.01]	0.0195903
Self-rated Health	-0.10393	[-0.17 , -0.03]	0.00342838		-0.0799212	[-0.15 , -0.01]	0.0218327		-0.104075	[-0.17 , -0.04]	0.00287918
Facial Aging	0.0113592	[-0.06 , 0.08]	0.742618		-0.00235784	[-0.07 , 0.07]	0.946131		0.0126297	[-0.05 , 0.08]	0.701877
Hannum Clock	b	95% CI	p-value		b	95% CI	p-value		b	95% CI	p-value
Balance	-0.0929089	[-0.16 , -0.02]	0.00853945		-0.0668516	[-0.14 , 0.00]	0.0581039		-0.0940939	[-0.16 , -0.03]	0.00550903
Gait Speed	-0.102418	[-0.17 , -0.03]	0.00312767		-0.0760749	[-0.14 , -0.01]	0.0294844		-0.103007	[-0.17 , -0.04]	0.00240938
Steps in Place	-0.0550532	[-0.12 , 0.01]	0.080411		-0.0435626	[-0.11 , 0.02]	0.166425		-0.0544126	[-0.11 , 0.01]	0.0752209
Chair Stands	-0.0958775	[-0.16 , -0.03]	0.00345383		-0.0901363	[-0.16 , -0.02]	0.00734391		-0.0946348	[-0.16 , -0.03]	0.00304994
Grip Strength	-0.0569403	[-0.13 , 0.01]	0.101519		-0.0574639	[-0.12 , 0.01]	0.0926259		-0.0570463	[-0.13 , 0.01]	0.101464
Motor Coordination	0.0121106	[-0.05 , 0.08]	0.723086		0.0208694	[-0.04 , 0.09]	0.524945		0.0132925	[-0.05 , 0.08]	0.693155
Physical Limitations	0.00453432	[-0.06 , 0.07]	0.896484		-0.0123887	[-0.08 , 0.06]	0.720529		0.00335436	[-0.06 , 0.07]	0.922979
Perceptual Reasoning	-0.0999859	[-0.17 , -0.03]	0.00263075		-0.0716561	[-0.14 , 0.00]	0.0355207		-0.0994362	[-0.16 , -0.04]	0.00144115
Working Memory	-0.0747675	[-0.14 , -0.01]	0.0250671		-0.0568626	[-0.12 , 0.01]	0.0999388		-0.07534	[-0.14 , -0.01]	0.0196234
Processing Speed	-0.0653898	[-0.13 , 0.00]	0.0649085		-0.0673465	[-0.14 , 0.00]	0.0596719		-0.0657292	[-0.13 , 0.00]	0.0535809
Self-rated Health	-0.105554	[-0.18 , -0.03]	0.00441642		-0.0853177	[-0.16 , -0.01]	0.018447		-0.106176	[-0.18 , -0.04]	0.00347205
Facial Aging	0.0476981	[-0.02 , 0.11]	0.143248		0.0416956	[-0.02 , 0.11]	0.212437		0.0497545	[-0.01 , 0.11]	0.104153
PhenoAge Clock	b	95% CI	p-value		b	95% CI	p-value		b	95% CI	p-value
Balance	-0.1084	[-0.18 , -0.04]	0.00233588		-0.0526232	[-0.13 , 0.02]	0.155513		-0.084638	[-0.15 , -0.02]	0.0150797
Gait Speed	-0.153286	[-0.22 , -0.08]	1.65125e-05		-0.121938	[-0.20 , -0.05]	0.00144632		-0.129388	[-0.20 , -0.06]	0.000317456
Steps in Place	-0.115852	[-0.19 , -0.05]	0.00108452		-0.103741	[-0.18 , -0.03]	0.00537403		-0.0872411	[-0.16 , -0.02]	0.0117847
Chair Stands	-0.102616	[-0.17 , -0.03]	0.0035141		-0.0850049	[-0.16 , -0.01]	0.0275097		-0.0832472	[-0.15 , -0.01]	0.0179254
Grip Strength	-0.00870227	[-0.08 , 0.07]	0.818032		-0.00810841	[-0.08 , 0.07]	0.833265		-0.00454633	[-0.08 , 0.07]	0.905816
Motor Coordination	0.00149213	[-0.10 , 0.11]	0.977841		0.0136144	[-0.08 , 0.11]	0.784409		0.021093	[-0.08 , 0.13]	0.693969
Physical Limitations	0.0267643	[-0.05 , 0.10]	0.498404		-0.000145056	[-0.08 , 0.08]	0.997152		0.00662512	[-0.07 , 0.09]	0.871567
Perceptual Reasoning	-0.118962	[-0.19 , -0.05]	0.000933527		-0.0831115	[-0.16 , -0.01]	0.0334516		-0.0878942	[-0.16 , -0.02]	0.0130567
Working Memory	-0.0909837	[-0.17 , -0.01]	0.0216147		-0.0719659	[-0.16 , 0.01]	0.0895595		-0.0704551	[-0.15 , 0.01]	0.0735127
Processing Speed	-0.088538	[-0.17 , -0.01]	0.0237504		-0.0880039	[-0.17 , 0.00]	0.038674		-0.0643542	[-0.14 , 0.01]	0.097379
Self-rated Health	-0.119155	[-0.19 , -0.05]	0.000565559		-0.0900247	[-0.16 , -0.02]	0.00989242		-0.0877292	[-0.16 , -0.02]	0.0115565
Facial Aging	0.111093	[0.04 , 0.18]	0.00193591		0.106268	[0.03 , 0.18]	0.00498395		0.0702046	[0.00 , 0.14]	0.0447041
GrimAge Clock	b	95% CI	p-value		b	95% CI	p-value		b	95% CI	p-value
Balance	-0.275012	[-0.34 , -0.21]	2.83382e-17		-0.216072	[-0.28 , -0.15]	9.10097e-10		-0.25409	[-0.34 , -0.17]	1.25062e-08
Gait Speed	-0.258188	[-0.32 , -0.20]	3.55904e-15		-0.226393	[-0.30 , -0.16]	3.31497e-10		-0.216098	[-0.31 , -0.12]	1.05402e-05
Steps in Place	-0.190709	[-0.25 , -0.13]	1.01572e-09		-0.151033	[-0.22 , -0.08]	9.28525e-06		-0.0563399	[-0.15 , 0.04]	0.226424
Chair Stands	-0.157962	[-0.22 , -0.09]	1.67395e-06		-0.123133	[-0.19 , -0.05]	0.000506652		-0.0923017	[-0.18 , 0.00]	0.0395302
Grip Strength	-0.039916	[-0.11 , 0.03]	0.235761		-0.0250398	[-0.09 , 0.04]	0.474029		-0.0322639	[-0.13 , 0.06]	0.514755
Motor Coordination	-0.150983	[-0.22 , -0.08]	9.69616e-06		-0.135161	[-0.20 , -0.07]	5.08948e-05		-0.0898617	[-0.18 , 0.00]	0.0453992
Physical Limitations	0.158311	[0.09 , 0.23]	2.14698e-05		0.134568	[0.06 , 0.21]	0.000425449		0.0971008	[0.00 , 0.19]	0.0492722
Perceptual Reasoning	-0.315272	[-0.38 , -0.25]	4.67585e-23		-0.295992	[-0.36 , -0.23]	2.34903e-17		-0.262356	[-0.35 , -0.18]	4.06091e-09
Working Memory	-0.260541	[-0.32 , -0.20]	7.93549e-16		-0.249967	[-0.32 , -0.18]	6.26283e-13		-0.256822	[-0.34 , -0.17]	1.30794e-08
Processing Speed	-0.225167	[-0.29 , -0.16]	1.5648e-11		-0.208638	[-0.28 , -0.14]	4.53295e-09		-0.158924	[-0.25 , -0.07]	0.000711584
Self-rated Health	-0.297797	[-0.36 , -0.23]	1.10528e-17		-0.238651	[-0.31 , -0.17]	1.01109e-10		-0.21951	[-0.32 , -0.12]	2.00895e-05
Facial Aging	0.36749	[0.30 , 0.43]	2.39855e-26		0.365882	[0.29 , 0.44]	7.69467e-22		0.242051	[0.15 , 0.33]	1.24172e-07
Longitudinal Pace of Aging	b	95% CI	p-value		b	95% CI	p-value		b	95% CI	p-value
Balance	-0.371818	[-0.43 , -0.32]	1.29502e-34		-0.336462	[-0.40 , -0.27]	4.78379e-25		-0.340753	[-0.40 , -0.28]	1.45159e-26
Grip Strength	-0.323854	[-0.39 , -0.25]	3.51668e-19		-0.309933	[-0.38 , -0.24]	1.78784e-16		-0.28463	[-0.36 , -0.21]	1.16596e-13
Gait Speed	-0.289516	[-0.36 , -0.22]	4.07943e-17		-0.261023	[-0.33 , -0.19]	7.14463e-13		-0.237017	[-0.31 , -0.17]	1.32596e-10
Steps in Place	-0.30326	[-0.36 , -0.24]	1.72001e-21		-0.293087	[-0.36 , -0.23]	2.17571e-17		-0.281828	[-0.35 , -0.22]	3.20494e-17
Chair Stands	-0.091218	[-0.16 , -0.02]	0.0126526		-0.0727457	[-0.15 , 0.00]	0.0560815		-0.0900781	[-0.17 , -0.01]	0.0192404
Physical Limitations	0.264368	[0.19 , 0.34]	1.4678e-11		0.25713	[0.18 , 0.34]	1.10134e-09		0.239402	[0.16 , 0.32]	1.80012e-08
Perceptual Reasoning	-0.273832	[-0.34 , -0.21]	1.75947e-17		-0.249922	[-0.32 , -0.18]	5.12613e-13		-0.21067	[-0.28 , -0.14]	9.9692e-10
Working Memory	-0.247552	[-0.31 , -0.18]	9.11151e-14		-0.246151	[-0.32 , -0.18]	6.74308e-12		-0.210172	[-0.28 , -0.14]	3.07398e-09
Processing Speed	-0.251121	[-0.32 , -0.18]	2.04478e-12		-0.236311	[-0.31 , -0.16]	2.57617e-09		-0.205152	[-0.28 , -0.13]	1.0232e-07
Self-rated Health	-0.348468	[-0.42 , -0.28]	1.25972e-20		-0.299501	[-0.37 , -0.22]	1.69695e-14		-0.292034	[-0.37 , -0.22]	2.58888e-14
Facial Aging	0.328408	[0.26 , 0.40]	1.45646e-18		0.32456	[0.25 , 0.40]	1.8499e-15		0.237785	[0.17 , 0.31]	5.31851e-11

## Sheet: Panel B
	Model Adjusted for Sex				Model Adjusted for Sex and Cell Counts				Model Adjusted for Sex and Smoking
DunedinPACE	b/RR	95% CI	p-value		b/RR	95% CI	p-value		b/RR	95% CI	p-value
Change in Balance	-0.068736	[-0.13 , -0.01]	0.030575		-0.0743687	[-0.14 , -0.01]	0.0311542		-0.0643091	[-0.13 , 0.00]	0.0637657
Change in Grip Strength	0.00826817	[-0.06 , 0.08]	0.824247		0.00626234	[-0.07 , 0.08]	0.87377		0.0127837	[-0.07 , 0.09]	0.75113
Change in Motor Coordination	-0.0686785	[-0.15 , 0.01]	0.0852757		-0.0587852	[-0.14 , 0.03]	0.17302		-0.0548772	[-0.14 , 0.03]	0.200826
Change in Physical Limitations	0.108313	[0.03 , 0.19]	0.0064788		0.0915382	[0.01 , 0.18]	0.0322617		0.0934928	[0.01 , 0.18]	0.0374301
Cognitive Decline	-0.11816	[-0.19 , -0.05]	0.00136174		-0.10732	[-0.18 , -0.03]	0.00617648		-0.0545035	[-0.13 , 0.02]	0.166421
Incident Fair/Poor Health	1.79567	[1.48 , 2.18]	2.2808e-09		1.66357	[1.34 , 2.07]	5.44448e-06		1.53368	[1.21 , 1.95]	0.000480934
Facial Aging	0.120826	[0.06 , 0.19]	0.00030698		0.113593	[0.04 , 0.19]	0.00227425		0.0919385	[0.02 , 0.17]	0.0140855
DunedinPoAm	b/RR	95% CI	p-value		b/RR	95% CI	p-value		b/RR	95% CI	p-value
Change in Balance	-0.0588739	[-0.13 , 0.01]	0.0835069		-0.0630882	[-0.14 , 0.01]	0.100434		-0.0562045	[-0.14 , 0.02]	0.167276
Change in Grip Strength	-0.0311091	[-0.11 , 0.04]	0.409162		-0.0332938	[-0.12 , 0.05]	0.433652		-0.0438213	[-0.13 , 0.04]	0.325657
Change in Motor Coordination	-0.0527224	[-0.13 , 0.02]	0.163007		-0.0409184	[-0.13 , 0.04]	0.341669		-0.0303461	[-0.12 , 0.06]	0.492496
Change in Physical Limitations	0.06823	[-0.01 , 0.15]	0.0834951		0.0381789	[-0.06 , 0.13]	0.433219		0.0372622	[-0.06 , 0.13]	0.444966
Cognitive Decline	-0.152004	[-0.22 , -0.08]	3.55756e-05		-0.154126	[-0.23 , -0.07]	0.0001479		-0.0773162	[-0.17 , 0.01]	0.0922916
Incident Fair/Poor Health	1.87938	[1.54 , 2.29]	5.25686e-10		1.71138	[1.32 , 2.22]	5.85741e-05		1.61203	[1.19 , 2.18]	0.00188412
Facial Aging	0.111619	[0.05 , 0.17]	0.000455391		0.106953	[0.03 , 0.18]	0.00371894		0.0748223	[-0.01 , 0.16]	0.0731892
Horvath Clock	b/RR	95% CI	p-value		b/RR	95% CI	p-value		b/RR	95% CI	p-value
Change in Balance	0.0228075	[-0.05 , 0.09]	0.524681		0.0342606	[-0.04 , 0.10]	0.33762		0.0224789	[-0.05 , 0.09]	0.529891
Change in Grip Strength	0.0144783	[-0.05 , 0.08]	0.668677		0.0213242	[-0.05 , 0.09]	0.52886		0.0144594	[-0.05 , 0.08]	0.669212
Change in Motor Coordination	-0.0287819	[-0.10 , 0.04]	0.409841		-0.0248695	[-0.09 , 0.04]	0.48194		-0.0294997	[-0.10 , 0.04]	0.398556
Change in Physical Limitations	-0.0688786	[-0.15 , 0.01]	0.0800922		-0.0805591	[-0.16 , 0.00]	0.0409913		-0.0688278	[-0.15 , 0.01]	0.0780238
Cognitive Decline	-0.065161	[-0.13 , 0.00]	0.0595751		-0.0545354	[-0.12 , 0.01]	0.111152		-0.0652038	[-0.13 , 0.00]	0.0551601
Incident Fair/Poor Health	1.09897	[0.82 , 1.46]	0.51975		1.0523	[0.78 , 1.42]	0.7366		1.10295	[0.84 , 1.45]	0.487155
Facial Aging	-0.00669616	[-0.07 , 0.06]	0.836356		-0.0170241	[-0.08 , 0.05]	0.603579		-0.00535976	[-0.07 , 0.06]	0.86714
Hannum Clock	b/RR	95% CI	p-value		b/RR	95% CI	p-value		b/RR	95% CI	p-value
Change in Balance	-0.0344794	[-0.10 , 0.04]	0.333397		-0.0286804	[-0.10 , 0.04]	0.429331		-0.0352062	[-0.11 , 0.03]	0.322474
Change in Grip Strength	0.0285297	[-0.04 , 0.10]	0.43874		0.0433997	[-0.03 , 0.12]	0.241174		0.0284574	[-0.04 , 0.10]	0.439955
Change in Motor Coordination	0.0155617	[-0.06 , 0.09]	0.677492		0.0285334	[-0.05 , 0.10]	0.44841		0.0144133	[-0.06 , 0.09]	0.700086
Change in Physical Limitations	-0.0330783	[-0.10 , 0.04]	0.36463		-0.0503681	[-0.12 , 0.02]	0.16647		-0.0329015	[-0.10 , 0.04]	0.368388
Cognitive Decline	-0.0296559	[-0.10 , 0.04]	0.381968		-0.020808	[-0.09 , 0.05]	0.547098		-0.0284103	[-0.09 , 0.04]	0.391729
Incident Fair/Poor Health	1.19604	[0.94 , 1.53]	0.152837		1.10097	[0.85 , 1.43]	0.475264		1.18918	[0.94 , 1.51]	0.153394
Facial Aging	-0.00803991	[-0.07 , 0.06]	0.810596		-0.0159489	[-0.09 , 0.05]	0.651921		-0.0060798	[-0.07 , 0.06]	0.855965
PhenoAge Clock	b/RR	95% CI	p-value		b/RR	95% CI	p-value		b/RR	95% CI	p-value
Change in Balance	0.0198971	[-0.05 , 0.09]	0.56805		0.0223979	[-0.05 , 0.10]	0.556124		0.0249564	[-0.04 , 0.09]	0.473023
Change in Grip Strength	0.0580674	[-0.01 , 0.13]	0.0978902		0.0671944	[-0.01 , 0.14]	0.0792768		0.0597066	[-0.01 , 0.13]	0.0919162
Change in Motor Coordination	0.00142821	[-0.06 , 0.07]	0.966049		0.0166985	[-0.05 , 0.09]	0.640951		0.0080616	[-0.06 , 0.07]	0.812713
Change in Physical Limitations	-0.0318223	[-0.11 , 0.05]	0.430311		-0.0620545	[-0.14 , 0.02]	0.119658		-0.0421097	[-0.12 , 0.04]	0.312102
Cognitive Decline	-0.0623446	[-0.14 , 0.01]	0.0955013		-0.0706984	[-0.15 , 0.01]	0.0876915		-0.0409039	[-0.11 , 0.03]	0.272339
Incident Fair/Poor Health	1.2594	[1.00 , 1.59]	0.0506616		1.09596	[0.86 , 1.39]	0.453475		1.15464	[0.91 , 1.46]	0.233843
Facial Aging	0.0385499	[-0.03 , 0.10]	0.247308		0.0237728	[-0.05 , 0.10]	0.517048		0.0262794	[-0.04 , 0.09]	0.440134
GrimAge Clock	b/RR	95% CI	p-value		b/RR	95% CI	p-value		b/RR	95% CI	p-value
Change in Balance	-0.0451447	[-0.12 , 0.03]	0.213472		-0.0333769	[-0.11 , 0.04]	0.389509		-0.0360895	[-0.13 , 0.06]	0.468211
Change in Grip Strength	0.00897781	[-0.07 , 0.08]	0.814605		0.00702914	[-0.07 , 0.09]	0.861459		0.0246581	[-0.07 , 0.12]	0.625008
Change in Motor Coordination	-0.066438	[-0.14 , 0.01]	0.0814249		-0.0597	[-0.14 , 0.02]	0.128034		-0.0532846	[-0.15 , 0.04]	0.278992
Change in Physical Limitations	0.0837929	[0.01 , 0.16]	0.0264241		0.0646061	[-0.01 , 0.14]	0.109153		0.0620087	[-0.04 , 0.16]	0.236025
Cognitive Decline	-0.187649	[-0.25 , -0.12]	2.81491e-08		-0.169242	[-0.24 , -0.10]	4.26384e-06		-0.132824	[-0.23 , -0.04]	0.00532783
Incident Fair/Poor Health	1.80156	[1.51 , 2.15]	4.32039e-11		1.72696	[1.41 , 2.12]	1.54908e-07		1.56153	[1.18 , 2.07]	0.00197766
Facial Aging	0.0857885	[0.02 , 0.15]	0.00781532		0.0695993	[0.00 , 0.14]	0.0489031		0.0210384	[-0.07 , 0.11]	0.646149
Longitudinal Pace of Aging	b	95% CI	p-value		b	95% CI	p-value		b	95% CI	p-value
Change in Balance	-0.0845841	[-0.14 , -0.03]	0.00483371		-0.0995204	[-0.16 , -0.04]	0.002301		-0.0847462	[-0.15 , -0.02]	0.00848088
Change in Grip Strength	0.0328122	[-0.04 , 0.10]	0.372164		0.02721	[-0.05 , 0.10]	0.491483		0.0253399	[-0.05 , 0.10]	0.509536
Change in Motor Coordination	-0.0835658	[-0.16 , -0.01]	0.0274639		-0.0636637	[-0.14 , 0.02]	0.11947		-0.0742809	[-0.15 , 0.00]	0.0636809
Change in Physical Limitations	0.132962	[0.06 , 0.21]	0.000463413		0.129568	[0.05 , 0.21]	0.00197392		0.123024	[0.04 , 0.21]	0.00335108
Cognitive Decline	-0.0816704	[-0.15 , -0.01]	0.0237837		-0.043749	[-0.12 , 0.03]	0.267371		-0.0258576	[-0.10 , 0.05]	0.490477
Incident Fair/Poor Health	1.54371	[1.34 , 1.77]	9.01668e-10		1.51495	[1.29 , 1.78]	3.68896e-07		1.34724	[1.14 , 1.59]	0.000410434
Facial Aging	0.0804138	[0.02 , 0.14]	0.0144961		0.0687323	[0.00 , 0.14]	0.0507531		0.0566286	[-0.01 , 0.12]	0.102305

## Sheet: Panel C
	Model Adjusted for Age and Sex				Model Adjusted for Age, Sex, and Cell Counts				Model Adjusted for Age, Sex, and Smoking
DunedinPACE	b	95% CI	p-value		b	95% CI	p-value		b	95% CI	p-value
Phenotypic Age Advance	0.321325	[0.26 , 0.38]	1.62026e-23		0.303907	[0.24 , 0.37]	1.57254e-19		0.328775	[0.26 , 0.40]	9.00915e-21
KDM Advance	0.295403	[0.24 , 0.36]	4.42504e-21		0.282014	[0.22 , 0.35]	9.96378e-18		0.28218	[0.22 , 0.35]	1.91951e-17
Homeostatic Dysregulation	0.0947533	[0.03 , 0.16]	0.00523235		0.0730059	[0.00 , 0.14]	0.0387403		0.134222	[0.06 , 0.21]	0.000508523
Self-rated Health	0.204799	[0.15 , 0.26]	7.7442e-13		0.173089	[0.11 , 0.24]	6.33961e-08		0.148323	[0.09 , 0.21]	2.38084e-06
Grip Strength	-0.0918452	[-0.14 , -0.04]	0.000242837		-0.0764893	[-0.13 , -0.02]	0.00641933		-0.0975132	[-0.15 , -0.04]	0.000471162
DunedinPoAm	b	95% CI	p-value		b	95% CI	p-value		b	95% CI	p-value
Phenotypic Age Advance	0.234935	[0.18 , 0.29]	3.56749e-15		0.195523	[0.13 , 0.26]	1.56616e-09		0.25888	[0.19 , 0.33]	8.5246e-13
KDM Advance	0.249801	[0.19 , 0.31]	1.35498e-16		0.229618	[0.16 , 0.30]	1.15788e-11		0.253244	[0.18 , 0.32]	1.40356e-12
Homeostatic Dysregulation	0.0516144	[0.00 , 0.11]	0.0728561		0.0147643	[-0.05 , 0.08]	0.655742		0.114266	[0.04 , 0.18]	0.0014028
Self-rated Health	0.216009	[0.16 , 0.27]	7.52593e-14		0.183645	[0.12 , 0.25]	1.31941e-08		0.14433	[0.07 , 0.21]	5.05339e-05
Grip Strength	-0.0448071	[-0.09 , 0.00]	0.0719949		-0.0162751	[-0.07 , 0.04]	0.569729		-0.0447268	[-0.11 , 0.02]	0.162756
Horvath Clock	b	95% CI	p-value		b	95% CI	p-value		b	95% CI	p-value
Phenotypic Age Advance	0.0175464	[-0.05 , 0.08]	0.606242		0.0384067	[-0.03 , 0.10]	0.253861		0.00625024	[-0.06 , 0.08]	0.861848
KDM Advance	0.0475842	[-0.01 , 0.10]	0.0993311		0.0660919	[0.01 , 0.12]	0.0239586		0.0391011	[-0.02 , 0.10]	0.185508
Homeostatic Dysregulation	0.0197364	[-0.04 , 0.08]	0.519619		0.0421699	[-0.02 , 0.10]	0.178299		0.017832	[-0.04 , 0.08]	0.570275
Self-rated Health	-0.000779419	[-0.06 , 0.05]	0.977997		0.00361665	[-0.05 , 0.06]	0.901224		-0.00251089	[-0.06 , 0.05]	0.931743
Grip Strength	-0.00918134	[-0.06 , 0.04]	0.713002		0.00394106	[-0.05 , 0.05]	0.878387		-0.0141574	[-0.07 , 0.04]	0.590247
Hannum Clock	b	95% CI	p-value		b	95% CI	p-value		b	95% CI	p-value
Phenotypic Age Advance	0.112079	[0.05 , 0.18]	0.000841983		0.0837109	[0.01 , 0.16]	0.0225575		0.111537	[0.04 , 0.18]	0.00133495
KDM Advance	0.0850946	[0.02 , 0.15]	0.00583403		0.0610891	[0.00 , 0.13]	0.0681781		0.0852588	[0.02 , 0.15]	0.00704846
Homeostatic Dysregulation	0.0107756	[-0.05 , 0.07]	0.715621		-0.0103581	[-0.07 , 0.05]	0.747557		0.0202849	[-0.04 , 0.08]	0.508945
Self-rated Health	0.0291854	[-0.03 , 0.09]	0.310819		-0.00401771	[-0.07 , 0.06]	0.901846		0.00589968	[-0.05 , 0.07]	0.846159
Grip Strength	-0.00720767	[-0.06 , 0.04]	0.773927		0.0225314	[-0.03 , 0.08]	0.409641		-0.0137478	[-0.07 , 0.04]	0.604909
PhenoAge Clock	b	95% CI	p-value		b	95% CI	p-value		b	95% CI	p-value
Phenotypic Age Advance	0.178305	[0.12 , 0.24]	1.14541e-08		0.176724	[0.11 , 0.24]	4.22617e-08		0.166897	[0.10 , 0.23]	2.21594e-07
KDM Advance	0.167675	[0.11 , 0.23]	3.88337e-08		0.170062	[0.11 , 0.23]	7.42072e-08		0.150451	[0.09 , 0.21]	1.04953e-06
Homeostatic Dysregulation	0.0810126	[0.01 , 0.15]	0.018046		0.0801626	[0.01 , 0.15]	0.0237105		0.0853001	[0.02 , 0.16]	0.0173382
Self-rated Health	0.0835257	[0.03 , 0.14]	0.00211273		0.0676323	[0.01 , 0.12]	0.0194242		0.0516876	[0.00 , 0.11]	0.0647044
Grip Strength	-0.0627995	[-0.11 , -0.02]	0.00917755		-0.0416925	[-0.09 , 0.01]	0.105779		-0.0671805	[-0.12 , -0.02]	0.00822735
GrimAge Clock	b	95% CI	p-value		b	95% CI	p-value		b	95% CI	p-value
Phenotypic Age Advance	0.272104	[0.21 , 0.33]	1.06079e-18		0.22737	[0.17 , 0.29]	9.42756e-13		0.319544	[0.24 , 0.40]	4.50909e-16
KDM Advance	0.265221	[0.20 , 0.33]	3.61849e-17		0.230857	[0.17 , 0.30]	3.09884e-12		0.277266	[0.20 , 0.36]	4.72199e-12
Homeostatic Dysregulation	0.0565481	[-0.01 , 0.12]	0.100198		0.0225853	[-0.05 , 0.09]	0.514793		0.130815	[0.04 , 0.22]	0.00590577
Self-rated Health	0.232645	[0.18 , 0.29]	3.41035e-15		0.200623	[0.14 , 0.26]	5.33517e-10		0.176395	[0.10 , 0.25]	3.78603e-06
Grip Strength	-0.0429954	[-0.10 , 0.01]	0.114171		-0.0176799	[-0.08 , 0.04]	0.557248		-0.0478219	[-0.12 , 0.02]	0.171276

## Sheet: Panel D
MORTALITY
	Model Adjusted for Age and Sex				Model Adjusted for Age, Sex, and Cell Counts				Model Adjusted for Age, Sex, and Smoking
	HR	95% CI	p-value		HR	95% CI	p-value		HR	95% CI	p-value
Normative Aging Study
DunedinPACE	1.26	[1.14-1.40]	<0.001		1.24	[1.11-1.38]	<0.001		1.24	[1.11-1.38]	<0.001
DunedinPoAm	1.29	[1.16-1.45]	<0.001		1.28	[1.13-1.44]	<0.001		1.32	[1.17-1.48]	<0.001
Age Accleration Residuals
Horvath Clock	1.07	[0.94-1.22]	0.3081		1.08	[0.94-1.24]	0.2835		1.07	[0.94-1.23]	0.3205
Hannum Clock	1.05	[0.90-1.23]	0.5253		1.04	[0.89-1.22]	0.5983		1.04	[0.89-1.22]	0.5992
PhenoAge Clock	1.18	[1.05-1.34]	0.0078		1.19	[1.05-1.35]	0.0083		1.18	[1.04-1.34]	0.011
GrimAge Clock	1.32	[1.19-1.45]	<0.001		1.31	[1.18-1.45]	<0.001		1.36	[1.22-1.52]	<0.001
Framingham Heart Study
DunedinPACE	1.64655	[1.49-1.81]	7.05544e-24		1.55398	[1.40-1.72]	9.05365e-17		1.54731	[1.40-1.71]	3.5043e-18
DunedinPoAm	1.6568	[1.51-1.82]	8.31067e-27		1.52638	[1.33-1.76]	3.38057e-09		1.52565	[1.38-1.69]	1.44745e-15
Age Accleration Residuals
Horvath Clock	1.06199	[0.99-1.14]	0.113947		1.07319	[0.98-1.18]	0.134141		1.04549	[0.97-1.12]	0.229678
Hannum Clock	1.25422	[1.18-1.34]	1.00686e-11		1.12863	[1.04-1.22]	0.00210028		1.24022	[1.16-1.33]	5.03978e-10
PhenoAge Clock	1.32373	[1.24-1.42]	7.69128e-16		1.21679	[1.13-1.31]	2.01504e-07		1.28227	[1.20-1.38]	4.23266e-12
GrimAge Clock*	1.82292	[1.70-1.95]	1.62624e-64		1.79218	[1.66-1.93]	7.1129e-52		1.82767	[1.69-1.97]	3.09856e-55
*The GrimAge Clock was developed to predict mortality in the Framingham dataset.
PREVALENT CHRONIC DISEASE (NORMATIVE AGING STUDY)
	Model Adjusted for Age and Sex				Model Adjusted for Age, Sex, and Cell Counts				Model Adjusted for Age, Sex, and Smoking
	RR	95% CI	p-value		RR	95% CI	p-value		RR	95% CI	p-value
DunedinPACE	1.16	[1.12-1.20]	<0.001		1.16	[1.12-1.20]	<0.001		1.14	[1.04-1.18]	<0.001
DunedinPoAm	1.15027	[1.11-1.20]	<0.001		1.14706	[1.10-1.19]	<0.001		1.16369	[1.12-1.21]	<0.001
Age Accleration Residuals
Horvath Clock	1.07283	[1.03-1.12]	0.002		1.07961	[1.03-1.13]	0.001		1.07638	[1.03-1.13]	0.0012
Hannum Clock	1.04248	[1.00-1.09]	0.0737		1.03262	[0.98-1.08]	0.1887		1.04415	[1.00-1.09]	0.0647
PhenoAge Clock	1.13111	[1.08-1.18]	<0.001		1.13021	[1.08-1.18]	<0.001		1.13066	[1.08-1.18]	<0.001
GrimAge Clock	1.17821	[1.14-1.22]	<0.001		1.17821	[1.14-1.22]	<0.001		1.21	[1.16-1.25]	<0.001
INCIDENT CHRONIC DISEASE (NORMATIVE AGING STUDY)
	Model Adjusted for Age and Sex				Model Adjusted for Age, Sex, and Cell Counts				Model Adjusted for Age, Sex, and Smoking
	HR	95% CI	p-value		HR	95% CI	p-value		HR	95% CI	p-value
DunedinPACE	1.23	[1.07-1.42]	0.0043		1.21	[1.05-1.40]	0.0105		1.2	[1.04-1.36]	0.0119
DunedinPoAm	1.19	[1.03-1.38]	0.0194		1.18	[1.01-1.38]	0.0347		1.12	[0.95-1.31]	0.1689
Age Accleration Residuals
Horvath Clock	1.02	[0.86-1.20]	0.8508		0.98	[0.82-1.17]	0.8569		1.01	[0.86-1.20]	0.8567
Hannum Clock	1.17	[0.99-1.39]	0.0655		1.16	[0.97-1.39]	0.0942		1.18	[0.99-1.40]	0.0622
PhenoAge Clock	1.1	[0.93-1.31]	0.273		1.11	[0.93-1.33]	0.262		1.07	[0.90-1.27]	0.4559
GrimAge Clock	1.26	[1.09-1.45]	0.002		1.26	[1.09-1.47]	0.002		1.17	[0.99-1.38]	0.063
SURVIVAL TO DIAGNOSIS WITH CARDIOVASCULAR DISEASE (FRAMINGHAM HEART STUDY)
	Model Adjusted for Age and Sex				Model Adjusted for Age, Sex, and Cell Counts				Model Adjusted for Age, Sex, and Smoking
	HR	95% CI	p-value		HR	95% CI	p-value		HR	95% CI	p-value
DunedinPACE	1.39297	[1.26-1.54]	2.71729e-10		1.3973	[1.23-1.58]	1.12119e-07		1.38282	[1.25-1.53]	1.03339e-09
DunedinPoAm	1.27167	[1.13-1.43]	4.54215e-05		1.26051	[1.07-1.48]	0.00459875		1.23493	[1.09-1.40]	0.00129882
Age Accleration Residuals
Horvath Clock	1.0718	[0.98-1.17]	0.1353		1.04612	[0.94-1.16]	0.394015		1.06267	[0.97-1.17]	0.205679
Hannum Clock	1.21545	[1.11-1.33]	9.51004e-06		1.17104	[1.06-1.29]	0.00163439		1.20997	[1.11-1.32]	1.96233e-05
PhenoAge Clock	1.20614	[1.11-1.31]	9.93778e-06		1.16358	[1.06-1.27]	0.00114312		1.18938	[1.09-1.29]	4.42028e-05
GrimAge Clock	1.4728	[1.35-1.61]	6.37059e-18		1.53334	[1.37-1.72]	1.1357e-13		1.56833	[1.41-1.74]	1.3932e-16
SURVIVAL TO DIAGNOSIS WITH STROKE/ TRANSIENT ISCHEMIC ATTACK (TIA) (FRAMINGHAM HEART STUDY)
	Model Adjusted for Age and Sex				Model Adjusted for Age, Sex, and Cell Counts				Model Adjusted for Age, Sex, and Smoking
	HR	95% CI	p-value		HR	95% CI	p-value		HR	95% CI	p-value
DunedinPACE	1.37356	[1.19-1.58]	1.18814e-05		1.34247	[1.14-1.58]	0.000445748		1.44218	[1.23-1.69]	4.56369e-06
DunedinPoAm	1.27895	[1.08-1.51]	0.00384549		1.2009	[0.98-1.47]	0.0726105		1.367	[1.11-1.69]	0.00347563
Age Accleration Residuals
Horvath Clock	1.05808	[0.94-1.20]	0.365024		1.11844	[0.97-1.29]	0.116399		1.02839	[0.91-1.17]	0.664138
Hannum Clock	1.22773	[1.04-1.45]	0.014692		1.2085	[1.01-1.45]	0.039969		1.23059	[1.04-1.46]	0.017042
PhenoAge Clock	1.25869	[1.11-1.43]	0.000296677		1.23696	[1.07-1.43]	0.003271		1.25106	[1.11-1.42]	0.000382652
GrimAge Clock	1.32613	[1.16-1.52]	4.35722e-05		1.28153	[1.09-1.50]	0.00213018		1.5121	[1.27-1.80]	3.69458e-06
INCIDENT LIMITATION TO ACTIVITIES OF DAILY LIVING (NAGI ADLs)
	Model Adjusted for Age and Sex				Model Adjusted for Age, Sex, and Cell Counts				Model Adjusted for Age, Sex, and Smoking
	HR	95% CI	p-value		HR	95% CI	p-value		HR	95% CI	p-value
DunedinPACE	1.40184	[1.19-1.65]	6.59624e-05		1.41385	[1.16-1.72]	0.000570766		1.33395	[1.11-1.60]	0.00188337
DunedinPoAm	1.15129	[0.96-1.38]	0.125068		1.20323	[0.95-1.52]	0.123391		1.09762	[0.90-1.34]	0.368934
Age Accleration Residuals
Horvath Clock	1.08966	[0.91-1.31]	0.353966		1.08916	[0.92-1.29]	0.329553		1.08779	[0.91-1.30]	0.362883
Hannum Clock	1.17354	[1.00-1.38]	0.0511403		1.1261	[0.95-1.33]	0.169807		1.15138	[0.99-1.34]	0.0734859
PhenoAge Clock	1.11684	[0.90-1.39]	0.327707		1.05671	[0.85-1.32]	0.626884		1.09276	[0.87-1.37]	0.437675
GrimAge Clock	1.3728	[1.16-1.62]	0.000229274		1.48564	[1.23-1.80]	4.44211e-05		1.39556	[1.12-1.74]	0.00305854
INCIDENT LIMITATION TO ACTIVITIES OF DAILY LIVING (KATZ ADLs)
	Model Adjusted for Age and Sex				Model Adjusted for Age, Sex, and Cell Counts				Model Adjusted for Age, Sex, and Smoking
	IRR	95% CI	p-value		IRR	95% CI	p-value		IRR	95% CI	p-value
DunedinPACE	1.32973	[1.16-1.53]	5.51796e-05		1.37358	[1.16-1.63]	0.000254593		1.27023	[1.10-1.47]	0.00103833
DunedinPoAm	1.24024	[1.09-1.41]	0.00089391		1.36336	[1.18-1.58]	4.1698e-05		1.16474	[1.01-1.34]	0.0323133
Age Accleration Residuals
Horvath Clock	1.15213	[1.01-1.32]	0.0381782		1.14258	[0.98-1.34]	0.0986784		1.14629	[1.00-1.31]	0.0512876
Hannum Clock	1.14156	[1.02-1.28]	0.0189948		1.1228	[0.98-1.29]	0.101228		1.13601	[1.01-1.27]	0.0292987
PhenoAge Clock	1.22408	[1.07-1.40]	0.00336712		1.21867	[1.04-1.42]	0.0131907		1.19787	[1.04-1.38]	0.010753
GrimAge Clock	1.27183	[1.12-1.44]	0.000193216		1.32992	[1.15-1.54]	0.000153897		1.19938	[1.03-1.39]	0.0183477
INCIDENT LIMITATION TO ACTIVITIES OF DAILY LIVING (ROSOW-BRESLAU ADLs)
	Model Adjusted for Age and Sex				Model Adjusted for Age, Sex, and Cell Counts				Model Adjusted for Age, Sex, and Smoking
	IRR	95% CI	p-value		IRR	95% CI	p-value		IRR	95% CI	p-value
DunedinPACE	1.39071	[1.24-1.56]	3.10362e-08		1.38347	[1.18-1.62]	6.64806e-05		1.38071	[1.22-1.57]	5.03326e-07
DunedinPoAm	1.27258	[1.12-1.45]	0.000284196		1.29714	[1.13-1.49]	0.000168821		1.26436	[1.08-1.47]	0.0028135
Age Accleration Residuals
Horvath Clock	0.992635	[0.91-1.09]	0.872097		1.0216	[0.92-1.14]	0.692816		0.988591	[0.90-1.08]	0.806584
Hannum Clock	1.13366	[1.01-1.27]	0.0361685		1.11365	[1.00-1.24]	0.0508152		1.1302	[1.00-1.27]	0.0415276
PhenoAge Clock	1.04185	[0.93-1.17]	0.487056		1.00445	[0.90-1.12]	0.938748		1.03211	[0.92-1.16]	0.593554
GrimAge Clock	1.34871	[1.20-1.51]	3.56054e-07		1.37386	[1.20-1.57]	2.15533e-06		1.41448	[1.22-1.64]	5.27735e-06

## Sheet: Panel E
	Model Adjusted for Sex				Model Adjusted for Sex and Cell Counts				Model Adjusted for Sex and Smoking				Model Adjusted for Sex, Non-smokers
DunedinPACE	b	95% CI	p-value		b	95% CI	p-value		b	95% CI	p-value		b	95% CI	p-value
Childhood SES
High	Ref
Middle	0.218788	[0.08 , 0.36]	0.00236732		0.176863	[0.06 , 0.30]	0.00358138		0.186787	[0.05 , 0.32]	0.00750026		0.136187	[-0.01 , 0.28]	0.063086
Low	0.398061	[0.27 , 0.53]	4.87311e-09		0.347897	[0.24 , 0.46]	1.95591e-09		0.311678	[0.18 , 0.45]	7.01751e-06		0.312362	[0.16 , 0.46]	5.72481e-05
Childhood Victimization (types)
Unexposed	Ref
1 type	0.12125	[-0.02 , 0.26]	0.0882581		0.103523	[-0.02 , 0.23]	0.0951579		0.070082	[-0.07 , 0.21]	0.317588		0.125341	[-0.03 , 0.28]	0.110344
2 types	0.501317	[0.20 , 0.80]	0.000943117		0.424106	[0.16 , 0.68]	0.00144141		0.364266	[0.07 , 0.66]	0.0145417		0.558118	[0.10 , 1.02]	0.0175807
3+ types	0.598241	[0.32 , 0.88]	3.20423e-05		0.584765	[0.29 , 0.88]	0.000125725		0.47327	[0.20 , 0.74]	0.000612061		0.3815	[0.00 , 0.76]	0.0477613
DunedinPoAm	b	95% CI	p-value		b	95% CI	p-value		b	95% CI	p-value		b	95% CI	p-value
Childhood SES
High	Ref
Middle	0.307726	[0.18 , 0.44]	4.86663e-06		0.289234	[0.18 , 0.40]	1.18951e-07		0.226632	[0.10 , 0.35]	0.000302052		0.128196	[0.00 , 0.26]	0.0520896
Low	0.435357	[0.31 , 0.56]	5.03446e-11		0.406007	[0.30 , 0.51]	8.8928e-14		0.226725	[0.10 , 0.35]	0.000321901		0.192713	[0.06 , 0.32]	0.00433917
Childhood Victimization (types)
Unexposed	Ref
1 type	0.213888	[0.08 , 0.35]	0.0016528		0.216075	[0.11 , 0.33]	0.000130441		0.095359	[-0.03 , 0.22]	0.129249		0.118249	[-0.01 , 0.25]	0.0736045
2 types	0.405464	[0.15 , 0.66]	0.00182038		0.34175	[0.11 , 0.58]	0.004155		0.0787678	[-0.14 , 0.30]	0.482147		0.00234253	[-0.28 , 0.29]	0.98713
3+ types	0.463605	[0.17 , 0.75]	0.00170878		0.4088	[0.14 , 0.68]	0.00302792		0.165936	[-0.12 , 0.45]	0.258712		0.42215	[0.10 , 0.75]	0.0108579
Horvath Clock	b	95% CI	p-value		b	95% CI	p-value		b	95% CI	p-value		b	95% CI	p-value
Childhood SES
High	Ref
Middle	0.066195	[-0.07 , 0.20]	0.345422		0.0871104	[-0.05 , 0.22]	0.206694		0.0849546	[-0.05 , 0.22]	0.227577		0.108785	[-0.04 , 0.26]	0.153092
Low	0.0307008	[-0.10 , 0.16]	0.653476		0.0513767	[-0.08 , 0.18]	0.439005		0.0761151	[-0.06 , 0.21]	0.279804		0.092861	[-0.06 , 0.25]	0.232966
Childhood Victimization (types)
Unexposed	Ref
1 type	-0.020362	[-0.15 , 0.11]	0.75883		-0.0238645	[-0.15 , 0.10]	0.710079		0.0041383	[-0.13 , 0.14]	0.950893		-0.0428728	[-0.20 , 0.12]	0.598723
2 types	-0.106175	[-0.41 , 0.20]	0.498846		-0.0552096	[-0.33 , 0.22]	0.692461		-0.0494135	[-0.36 , 0.26]	0.757008		-0.178905	[-0.61 , 0.25]	0.415442
3+ types	0.122471	[-0.15 , 0.39]	0.369733		0.138775	[-0.12 , 0.40]	0.294269		0.174924	[-0.09 , 0.44]	0.198718		0.0580685	[-0.24 , 0.35]	0.69846
Hannum Clock	b	95% CI	p-value		b	95% CI	p-value		b	95% CI	p-value		b	95% CI	p-value
Childhood SES
High	Ref
Middle	0.0589405	[-0.08 , 0.19]	0.394373		0.046355	[-0.04 , 0.13]	0.279176		0.0691087	[-0.07 , 0.21]	0.319193		0.100085	[-0.05 , 0.25]	0.192073
Low	-0.0275464	[-0.17 , 0.11]	0.70006		-0.0257965	[-0.11 , 0.06]	0.543072		-0.00369864	[-0.15 , 0.14]	0.959928		0.0249893	[-0.14 , 0.19]	0.768086
Childhood Victimization (types)
Unexposed	Ref
1 type	0.0314521	[-0.10 , 0.17]	0.648422		-0.019647	[-0.10 , 0.06]	0.642826		0.045229	[-0.09 , 0.18]	0.517445		0.0671045	[-0.10 , 0.23]	0.428398
2 types	-0.0337933	[-0.34 , 0.27]	0.826182		-0.0176163	[-0.16 , 0.13]	0.810945		-0.00114151	[-0.31 , 0.31]	0.994177		0.00827472	[-0.46 , 0.48]	0.972495
3+ types	-0.198377	[-0.50 , 0.10]	0.193685		-0.140621	[-0.32 , 0.04]	0.131818		-0.168221	[-0.48 , 0.14]	0.285944		-0.420047	[-0.87 , 0.03]	0.0660662
PhenoAge Clock	b	95% CI	p-value		b	95% CI	p-value		b	95% CI	p-value		b	95% CI	p-value
Childhood SES
High	Ref
Middle	0.180437	[0.05 , 0.31]	0.00762086		0.170304	[0.06 , 0.28]	0.00321063		0.181385	[0.05 , 0.31]	0.00758441		0.193724	[0.05 , 0.34]	0.0100318
Low	0.182539	[0.05 , 0.32]	0.0071261		0.173629	[0.06 , 0.28]	0.00227235		0.182023	[0.04 , 0.32]	0.00985874		0.166841	[0.01 , 0.32]	0.0377647
Childhood Victimization (types)
Unexposed	Ref
1 type	0.103541	[-0.03 , 0.24]	0.136992		0.069035	[-0.05 , 0.18]	0.238845		0.0983196	[-0.04 , 0.24]	0.167373		0.0846821	[-0.08 , 0.25]	0.322966
2 types	0.0157387	[-0.23 , 0.26]	0.900731		-0.00076711	[-0.22 , 0.22]	0.994468		-0.00352905	[-0.26 , 0.25]	0.978288		-0.0623325	[-0.46 , 0.34]	0.758934
3+ types	-0.0957812	[-0.40 , 0.21]	0.539686		-0.0735058	[-0.30 , 0.16]	0.533075		-0.112935	[-0.42 , 0.20]	0.473276		-0.186831	[-0.65 , 0.28]	0.433044
GrimAge Clock	b	95% CI	p-value		b	95% CI	p-value		b	95% CI	p-value		b	95% CI	p-value
Childhood SES
High	Ref
Middle	0.264566	[0.13 , 0.39]	6.94489e-05		0.245272	[0.14 , 0.35]	9.04799e-06		0.179705	[0.06 , 0.30]	0.00348563		0.0997082	[-0.02 , 0.22]	0.108449
Low	0.531794	[0.39 , 0.67]	6.13337e-14		0.509487	[0.39 , 0.63]	6.20936e-17		0.315621	[0.19 , 0.45]	2.25313e-06		0.262793	[0.13 , 0.40]	0.000156359
Childhood Victimization (types)
Unexposed	Ref
1 type	0.232688	[0.10 , 0.37]	0.000894925		0.228481	[0.11 , 0.35]	0.000168567		0.109615	[-0.01 , 0.23]	0.082973		0.10366	[-0.02 , 0.23]	0.104555
2 types	0.607865	[0.30 , 0.92]	0.000117335		0.519973	[0.24 , 0.80]	0.000284857		0.26458	[0.00 , 0.53]	0.0540943		0.181613	[-0.13 , 0.50]	0.257954
3+ types	0.441306	[0.05 , 0.83]	0.0274792		0.411198	[0.04 , 0.78]	0.0291674		0.128669	[-0.21 , 0.46]	0.449921		0.0643864	[-0.30 , 0.43]	0.730425
