# Supplementary figures and images for: DunedinPACE, a DNA methylation biomarker of the pace of aging
Source: eLife journal article supplement (doi:10.7554/elife.73420), 2022-01-14

Pace of Aging  
26–38

0.57

0.62

0.51

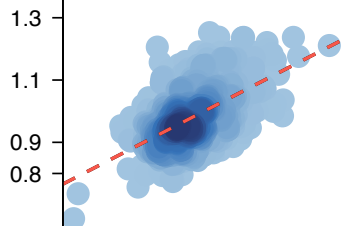

DunedinPoAm

0.47

0.59

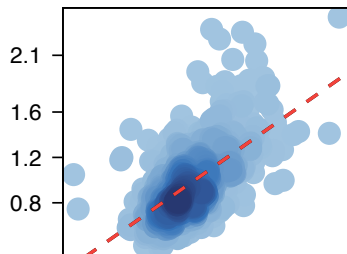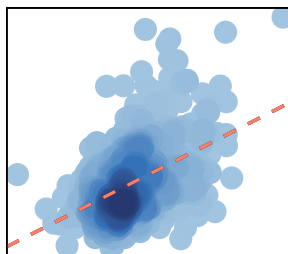

Pace of Aging  
26–45

0.78

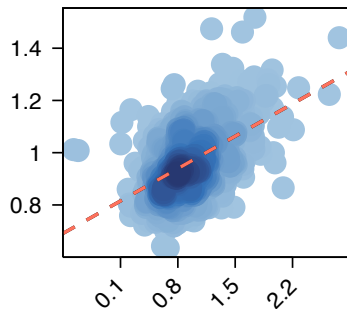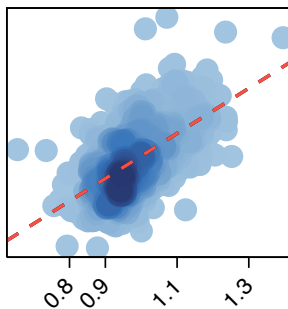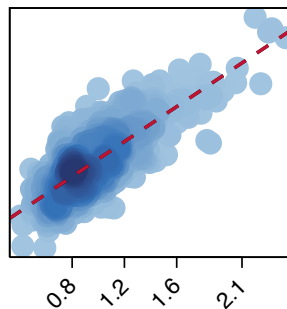

DunedinPoAm4x

Supplement: supp [file elife_poa_e73420_Figure_1_figure_supplement_1.pdf › elife_poa_e73420_Figure_1_figure_supplement_1.pdf]

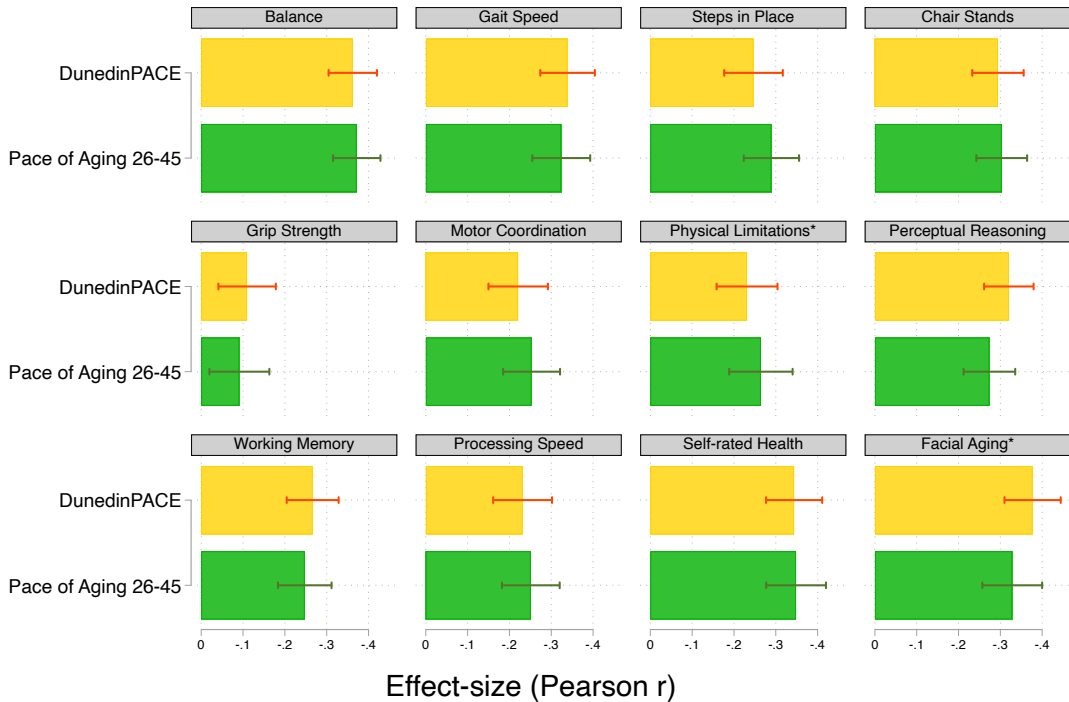

Supplement: supp [file elife_poa_e73420_Figure_1_figure_supplement_2.pdf › elife_poa_e73420_Figure_1_figure_supplement_2.pdf]

Effect-size (Pearson  $r$ )

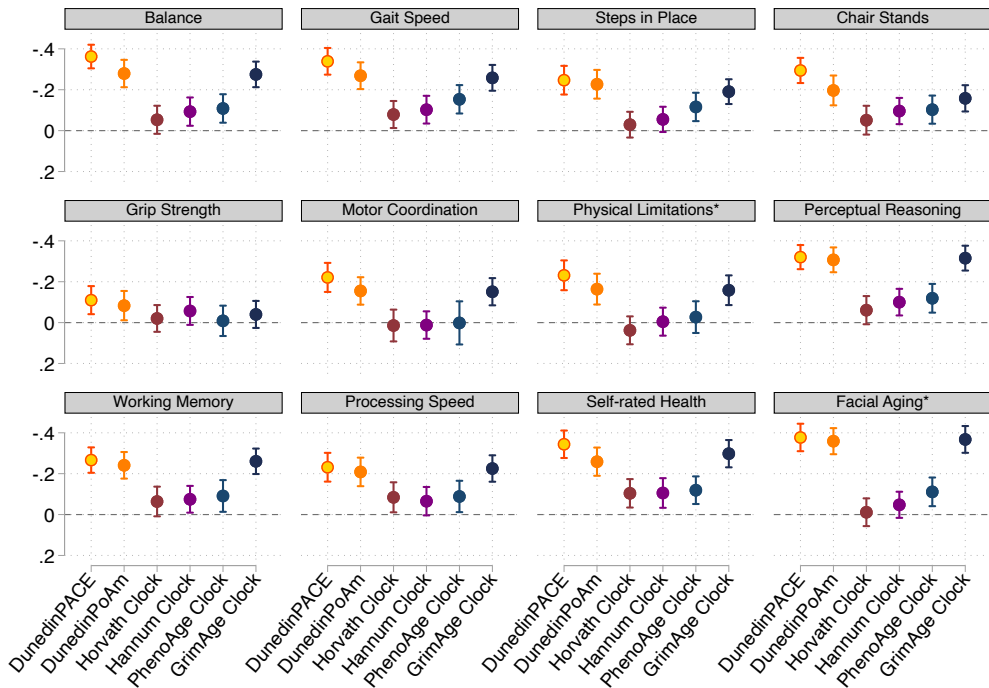

Supplement: supp [file elife_poa_e73420_Figure_1_figure_supplement_3.pdf › elife_poa_e73420_Figure_1_figure_supplement_3.pdf]

Effect-size (Pearson  $r$ )

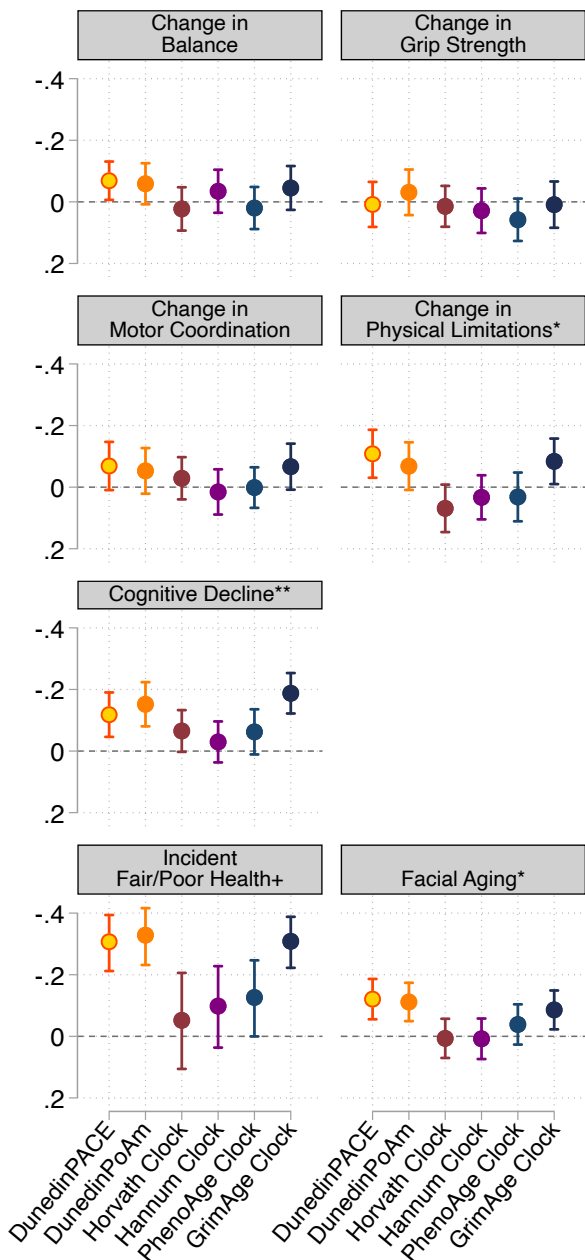

Supplement: supp [file elife_poa_e73420_Figure_1_figure_supplement_4.pdf › elife_poa_e73420_Figure_1_figure_supplement_4.pdf]

ICC

GSE55763  
(n=36 450K replicates)

Sugden A  
(n=28 EPIC replicates)

Sugden B  
(n=350 450k-EPIC replicates)

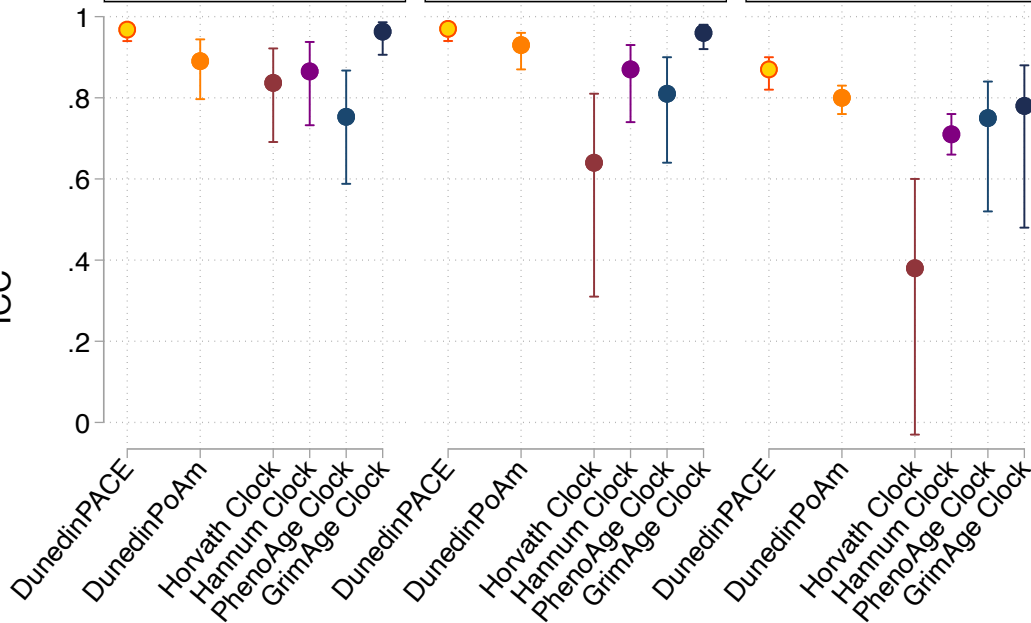

Supplement: supp [file elife_poa_e73420_Figure_2_figure_supplement_1.pdf › elife_poa_e73420_Figure_2_figure_supplement_1.pdf]

Mortality Effect-size (HR)

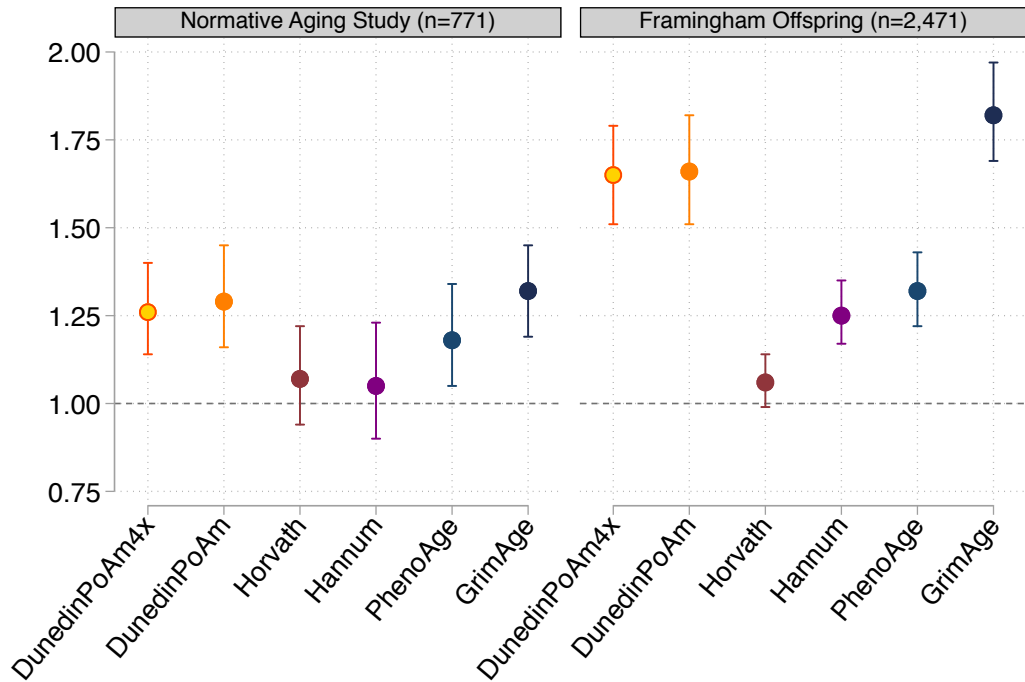

Supplement: supp [file elife_poa_e73420_Figure_4_figure_supplement_1.pdf › elife_poa_e73420_Figure_4_figure_supplement_1.pdf]

Chronic Disease Risk Effect-size (RR)

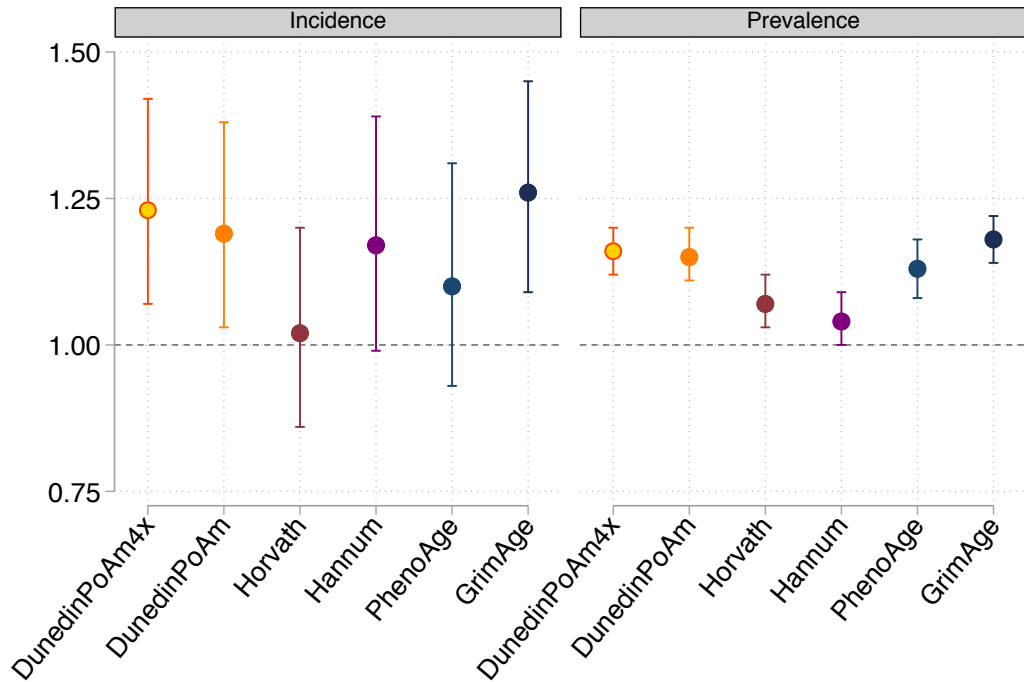

Supplement: supp [file elife_poa_e73420_Figure_4_figure_supplement_2.pdf › elife_poa_e73420_Figure_4_figure_supplement_2.pdf]

Time-to-Event Effect-size (HR)

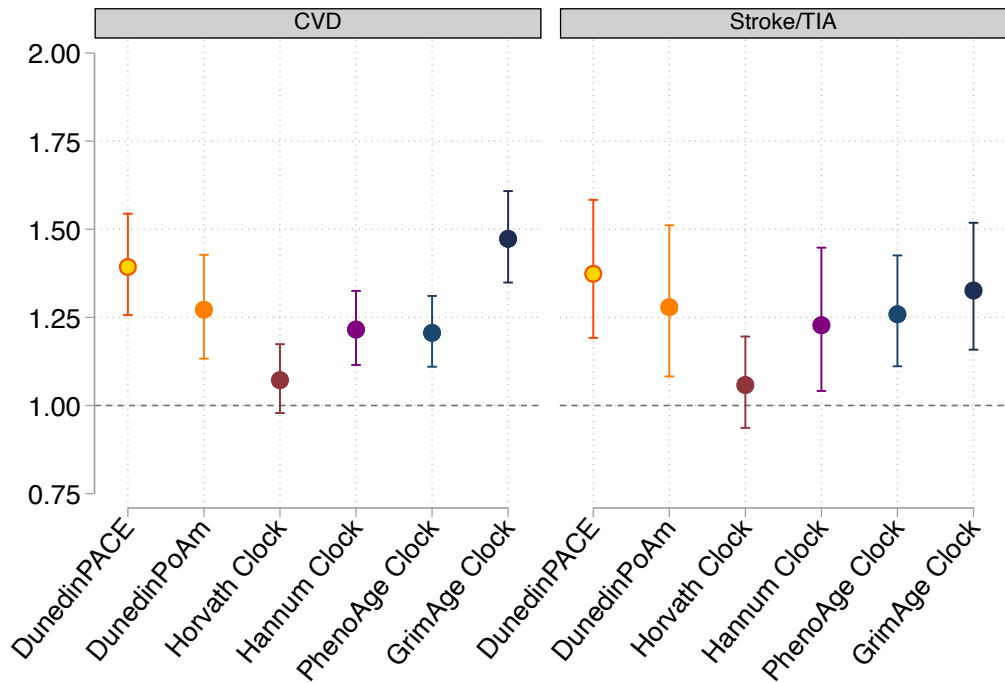

Supplement: supp [file elife_poa_e73420_Figure_4_figure_supplement_3.pdf › elife_poa_e73420_Figure_4_figure_supplement_3.pdf]

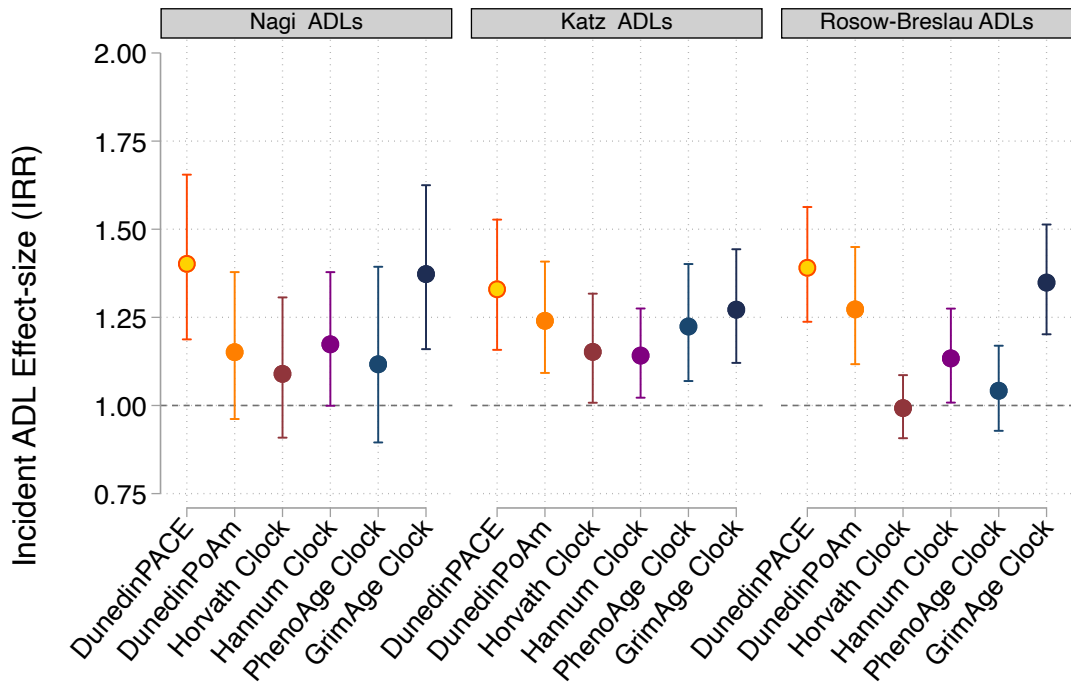

Supplement: supp [file elife_poa_e73420_Figure_4_figure_supplement_4.pdf › elife_poa_e73420_Figure_4_figure_supplement_4.pdf]

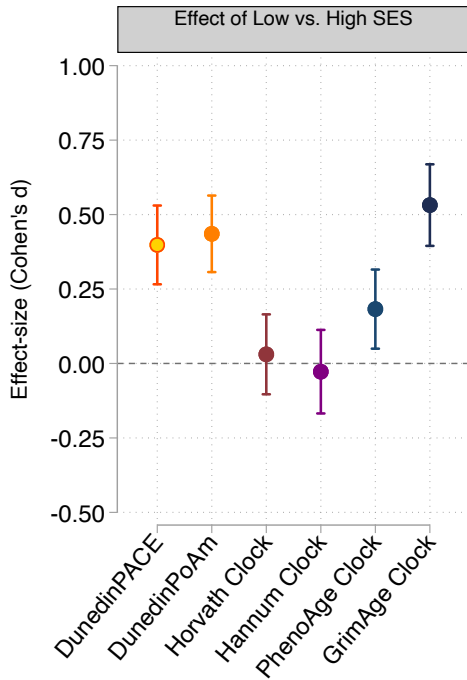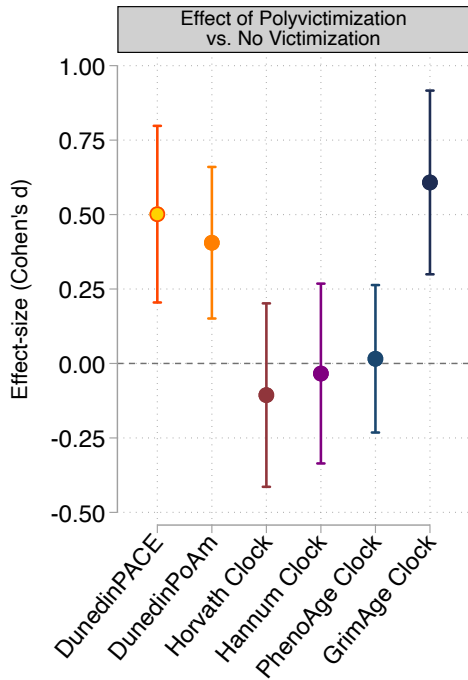

Supplement: supp [file elife_poa_e73420_Figure_5_figure_supplement_1.pdf › elife_poa_e73420_Figure_5_figure_supplement_1.pdf]
